## **Short Paper: Seroepidemiology of SARS-CoV-2 infections in an urban Nicaraguan population**

Fredman González<sup>1\*</sup>, Nadja A. Vielot<sup>2\*</sup>, Michael Sciaudone<sup>3</sup>, Christian Toval-Ruíz<sup>1</sup>, Lakshmanane Premkumar<sup>4</sup>, Lester Gutierrez<sup>1</sup>, Edwing Centeno Cuadra<sup>1</sup>, Patricia Blandón<sup>1</sup>, Aravinda M. de Silva<sup>4</sup>, Rebecca Rubinstein, Natalie Bowman<sup>3</sup>, Sylvia Becker-Dreps<sup>2\*</sup>, Filemon Bucardo<sup>1\*</sup>

1. Center for Infectious Diseases Research, National Autonomous University of Nicaragua – León, León, Nicaragua

2. Department of Family Medicine, University of North Carolina at Chapel Hill, Chapel Hill, North Carolina, USA

3. Division of Infectious Diseases, University of North Carolina at Chapel Hill, Chapel Hill, North Carolina, USA

4. Department of Microbiology and Immunology, University of North Carolina at Chapel Hill, Chapel Hill, North Carolina, USA

5. School of Medicine, University of North Carolina at Chapel Hill, Chapel Hill, North Carolina, USA

\* = signifies equal contribution as first and senior authors

Corresponding Author:

Filemon Bucardo, PhD

Center for Infectious Diseases Research

National Autonomous University of Nicaragua, León

León, Nicaragua

[Fili\\_bucardo@hotmail.com](mailto:Fili_bucardo@hotmail.com)

+505 8904 0938

Abstract word count: 47 words

Manuscript word count: 1,441 words

Running title: SARS-CoV-2 seroepidemiology in Nicaragua

1 **ABSTRACT**

2 In a Nicaraguan population-based cohort, SARS-CoV-2 seroprevalence was 34%, with higher prevalence  
3 in children compared to adults. Having a seropositive household member was associated with a two-fold  
4 probability of individual seropositivity, suggesting a role for household transmission. Co-morbidities and  
5 preventive behaviors were not associated with SARS-CoV-2 seroprevalence.

Keywords: SARS-CoV-2, COVID-19, seroprevalence, epidemiology, Nicaragua

## 6 INTRODUCTION

7 SARS-CoV-2 transmission continues globally.<sup>1</sup> The pandemic is now entering a prolonged phase,  
8 potentially causing multiple waves of infection in populations that have not attained community  
9 immunity. In this new phase, information on SARS-CoV-2 seroprevalence in different populations is  
10 urgently needed to understand the magnitude of SARS-CoV-2 spread in previous waves, predict future  
11 waves, and measure the risk of re-infection in previously exposed persons. Furthermore, little is known  
12 about SARS-CoV-2 seroprevalence in different age groups or in individuals with factors which place  
13 them at higher risk for poor outcomes.

14 Prior studies have measured SARS-CoV-2 seroprevalence in hotspots that were heavily impacted by  
15 infections in the first wave of the pandemic (Dec 2019-May 2020). In Wuhan, China, where the pandemic  
16 originated, seroprevalence was 4% in May 2020; in Lombardy, Italy, seroprevalence among blood donors  
17 reached 23% by April 2020.<sup>2,3</sup> This wide range of estimates suggests that geographical, social, and  
18 economic differences, as well as the implementation of containment measures can greatly affect exposure  
19 to and infection with SARS-CoV-2.

20 Even less is known in low-and middle-income countries (LMICs), which have limited resources to  
21 perform molecular detection of SARS-CoV-2 in real time, complicating estimates of infection incidence  
22 and individual disease risk. Furthermore, LMICs have fewer resources to support remote work and  
23 schooling, hygiene measures, and vaccines, and households are often multi-generational. The goal of this  
24 study was to estimate the seroprevalence of SARS-CoV-2 in a population-based sample in León,  
25 Nicaragua since SARS-CoV-2 infections were first reported in March 2020. These data on the prevalence  
26 of past infections can be used to guide public health recommendations and inform the need for  
27 continuation of SARS-CoV-2 prevention measures.

## 28 METHODS

29 *Study Design and Population*

30 The Sapovirus-Associated Gastro-Enteritis (SAGE) study is a population-based birth cohort study in  
31 León, Nicaragua, described previously.<sup>4</sup> This cohort provided a platform to access a sample of all ages to  
32 understand the seroprevalence of SARS-CoV-2 in a Latin American context, and to examine differences  
33 in participant characteristics by evidence of prior infection. The study population included high-income  
34 families in the city center and low-income families in peri-urban neighborhoods, creating a scientifically-  
35 informative gradient to evaluate socioeconomic and environmental risk factors for SARS-CoV-2  
36 infection. Starting in July 2020, we contacted the household members of cohort children (both adults and  
37 children) and offered participation in this study. We also offered participation in the study for cohort  
38 children, including those who had reached 36 months of age. The study was approved by the Institutional  
39 Review Boards of the National Autonomous University of Nicaragua, León (UNAN-León, acta No. 170,  
40 2020) and the University of North Carolina at Chapel Hill (Study #: 20-2126). All adult participants  
41 provided informed consent, and parental permission was required for children's participation in the study.  
42 In September and October 2020, we collected baseline demographic and health history data and collected  
43 blood from all participants for baseline SARS-CoV-2 serology. The current report summarizes the  
44 seroprevalence of SARS-CoV-2, stratifying by co-morbidities and sociodemographic factors.

#### 45 *Specimen Collection and Laboratory Methods*

46 SARS-CoV-2 infection induces the production of antibodies (Ab) against the spike protein and  
47 nucleocapsid protein, with most patients seroconverting within 2 weeks of symptom onset.<sup>5</sup> We used an  
48 in-house enzyme-linked immunosorbent (ELISA) assay to measure antibodies (IgG, IgA, and IgM) to the  
49 receptor binding domain (RBD) of the SARS-CoV-2 spike protein, which we have previously shown to  
50 be highly sensitive and specific for detecting antibodies for at least six months among individuals  
51 experiencing symptomatic infection.<sup>5</sup> The spike RBD-based assay does not cross-react with common  
52 endemic coronaviruses, and the magnitude of RDB antibody titers correlate with neutralizing antibody  
53 titers, currently the best correlate of protection against infection.<sup>5</sup> In brief, ELISA plates (Greiner Bio-One  
54 #655061) were coated with 4µg/ml of the RBD antigen. Heat-inactivated serum diluted at 1:40 was

55 subsequently added and alkaline phosphate conjugated secondary goat anti-human Abs (anti-IgG [Sigma],  
56 anti-IgA [Ab cam], and anti-IgM [Sigma]) were added at 1:2,500 dilution for detection. The immunologic  
57 reaction was developed with para-Nitrophenyl phosphate substrate (SIGMA). The optical density (OD)  
58 was measured after 15 min at 405nm. A serum was considered positive if the positive/negative (P/N) ratio  
59 between the serum OD and the negative-control OD was  $\geq 2.57$ , to ensure 99.5% specificity per CDC  
60 guidelines.<sup>6</sup>

### 61 *Statistical Analysis*

62 We analyzed cross-sectional data using frequencies and percentages to characterize SARS-CoV-2  
63 seroprevalence, stratified by sex, age group, smoking status, presence of comorbidities, and  
64 socioeconomic characteristics of the household. We implemented generalized estimating equations to  
65 estimate prevalence ratios (PRs) comparing seropositivity proportion by select individual and household  
66 characteristics, accounting for clustering of individuals within households.

## 67 **RESULTS**

68 Between September and October 2020, we enrolled 1,847 participants from 295 households. Of 1,351  
69 individuals who provided serum samples, 456 were seropositive for SARS-CoV-2 (34%). In 192  
70 households (65%), at least one household member had SARS-CoV-2 antibodies at the time of enrollment.  
71 In these households, the median number of seropositive members was 2 (interquartile range: 1, 3), and the  
72 maximum number was 9.

73 Women were less likely to be seropositive than men (PR: 0.90, 95% CI: 0.77, 1.06), and younger age  
74 groups were more likely to be seropositive than older age groups (PR: 0.93, 95% CI: 0.88, 0.99), with  
75 approximately half of seropositive individuals younger than 15 years (Table). Smoking and the presence  
76 of comorbidities was associated with a lower prevalence of seropositivity, though several of these  
77 associations are imprecise due to small numbers. Seropositivity was not associated with physical  
78 distancing or masking behavior, nor with economic status of the household. Seropositivity was twice as

79 high among individuals who lived with another seropositive household member (PR: 1.97, 95% CI: 1.43,  
80 2.69).

## 81 **DISCUSSION**

82 Our results show a high rate of seropositivity for SARS-CoV-2 antibodies in a Nicaraguan population-  
83 based cohort. This suggests the actual number of SARS-CoV-2 infections in Nicaragua was higher than  
84 official reports, which might be explained by a high rate of asymptomatic and mild cases that did not seek  
85 medical attention, or by limited testing of patients who received medical attention. Our seroprevalence  
86 results are similar to those of another study from Brazil,<sup>7</sup> and those reported from SARS-CoV-2 hot spots  
87 in high income countries, such as Massachusetts and Northern Italy, although the Massachusetts study  
88 was not carried out in a population-based cohort.<sup>2,8</sup> In these studies, the seroprevalence of SARS-CoV-2  
89 antibodies was higher than expected based on the reported incidence of symptomatic SARS-CoV-2  
90 infections in the area. It is possible we slightly underestimated the actual number of SARS-CoV-2 cases  
91 because of the high P/N cutoff used to ensure high assay specificity. A recent study has shown anti-  
92 SARS-CoV-2 spike protein IgG remains detectable in most cases for at least 6 months after symptomatic  
93 infection, and our data were collected within 6 months of the first reported SARS-CoV-2 case in  
94 Nicaragua.<sup>9</sup> A recent cross-sectional study of Nicaraguan health care workers (HCWs) conducted over a  
95 one-month period found that 30% of participants had active SARS-CoV-2 infection, indicating that  
96 seroprevalence among Nicaraguan health care workers is likely higher than in the general population.<sup>10</sup>  
97 About half of SARS-CoV-2 infected HCWs were asymptomatic, and, similar to our results, men were  
98 more likely to have been infected.<sup>9</sup> Use of personal protective equipment is critical among HCWs, both to  
99 prevent contracting SARS-CoV-2 from infected patients and to prevent transmitting SARS-CoV-2 to  
100 patients, particularly when the HCW is asymptomatic.

101 We identified high seroprevalence among younger age groups, particularly in children between 5 and 14  
102 years of age (42%). Age-based differences in seropositivity were observed in Brazil and Italy,<sup>2,7</sup> however,  
103 they were more pronounced in our population. High seropositivity in children might be due to continued

104 operation of public schools throughout the epidemic. As children are more likely to experience mild  
105 symptoms than adults,<sup>11</sup> this finding suggests that school-aged children may contribute to active  
106 transmission, and controlling infections in this sub-population is essential to reduce the spread of SARS-  
107 CoV-2. We also found that most individuals reported practicing strict physical distancing or masking  
108 behavior outside of the home, though this did not have a significant impact on the seroprevalence.  
109 Transmission within the home may have been more important.<sup>12</sup> The median household size in our  
110 sample was 7 members, with a maximum of 26 members. Indeed, SARS-CoV-2 seropositivity was two-  
111 fold more frequent for individuals with a seropositive household member as compared to individuals who  
112 did not have a seropositive household member.

113 In conclusion, we found a high SARS-CoV-2 seroprevalence in this Nicaraguan population and  
114 confirmed that reported SARS-CoV-2 case counts underestimated the true number of infections. We also  
115 show that this population has not yet attained the theoretical community immunity threshold, and so  
116 continued containment measures are necessary. In the future, this population could be followed to  
117 understand the risk of recurrent infection, and repeated seroprevalence measurements could provide  
118 further information on transmission dynamics.

119 **ACKNOWLEDGEMENTS**

120 We greatly appreciate Yorling Picado, Nancy Corea Munguia, Franco Soto, and the SAGE field team for  
121 their important contributions to this study.

122 **FUNDING**

123 This work was supported by the National Institute of Allergy and Infectious Diseases (NIAID, grant  
124 number R01AI127845 to SBD, K24AI141744 to SBD). FG is supported by an international research  
125 capacity-building award from the Fogarty International Center (grant number D43TW010923).

126 **CONFLICTS OF INTEREST**

127 The authors report no conflicts of interest.



**Table. Characteristics associated with SARS-CoV-2 seropositivity of individuals in León, Nicaragua**

| Individual and household characteristics                              | Seronegative<br>(n=895)<br>n (%) | Seropositive<br>(n=456)<br>n (%) | Prevalence Ratio<br>(95% Confidence Interval) |
|-----------------------------------------------------------------------|----------------------------------|----------------------------------|-----------------------------------------------|
| <b>Sex</b>                                                            |                                  |                                  |                                               |
| Male                                                                  | 350 (63.8)                       | 199 (36.2)                       | 0.90 (0.77, 1.06)                             |
| Female                                                                | 545 (68.0)                       | 257 (32.0)                       |                                               |
| <b>Age group in years (n=1,325)</b>                                   |                                  |                                  |                                               |
| 0-4                                                                   | 218 (64.3)                       | 121 (35.7)                       | 0.93 (0.88, 0.99)                             |
| 5-14                                                                  | 145 (59.4)                       | 99 (40.6)                        |                                               |
| 15-29                                                                 | 263 (68.0)                       | 124 (32.0)                       |                                               |
| 30-49                                                                 | 165 (72.7)                       | 62 (27.3)                        |                                               |
| 50-69                                                                 | 81 (73.0)                        | 30 (27.0)                        |                                               |
| 70+                                                                   | 10 (52.6)                        | 9 (47.4)                         |                                               |
| <b>Smoking status (n=782)<sup>a</sup></b>                             |                                  |                                  |                                               |
| Ever smoker                                                           | 75 (72.8)                        | 28 (27.2)                        | 0.85 (0.62, 1.18)                             |
| Never smoker                                                          | 465 (68.5)                       | 214 (31.5)                       |                                               |
| <b>Presence of comorbidities (n=1,312)<sup>b</sup></b>                |                                  |                                  |                                               |
| No                                                                    | 788 (66.6)                       | 396 (33.4)                       | 0.88 (0.67, 1.15)                             |
| Yes                                                                   | 88 (68.8)                        | 40 (31.2)                        |                                               |
| <b>Diabetes (n=128)</b>                                               |                                  |                                  |                                               |
| No                                                                    | 68 (70.1)                        | 29 (29.9)                        | 1.12 (0.62, 2.01)                             |
| Yes                                                                   | 20 (64.5)                        | 11 (35.5)                        |                                               |
| <b>Hypertension (n=128)</b>                                           |                                  |                                  |                                               |
| No                                                                    | 41 (66.1)                        | 21 (33.9)                        | 0.85 (0.51, 1.44)                             |
| Yes                                                                   | 47 (71.2)                        | 19 (28.8)                        |                                               |
| <b>Malignancy (n=128)</b>                                             |                                  |                                  |                                               |
| No                                                                    | 86 (68.8)                        | 39 (31.2)                        | 1.20 (0.28, 5.01)                             |
| Yes                                                                   | 2 (66.7)                         | 1 (33.3)                         |                                               |
| <b>Autoimmune disease (n=128)</b>                                     |                                  |                                  |                                               |
| No                                                                    | 86 (68.3)                        | 40 (31.7)                        | n/a                                           |
| Yes                                                                   | 2 (100.0)                        | 0 (0.0)                          |                                               |
| <b>Physical distancing and masking behavior (n=1,325)<sup>c</sup></b> |                                  |                                  |                                               |
| Strict                                                                | 797 (66.7)                       | 398 (33.3)                       | 1.06 (0.91, 1.22)                             |
| Moderate                                                              | 31 (56.4)                        | 24 (43.6)                        |                                               |
| None                                                                  | 49 (65.3)                        | 26 (34.7)                        |                                               |
| <b>Crowding index (n=1,212)</b>                                       |                                  |                                  |                                               |
| Fewer than 2.7 people per bedroom                                     | 535 (66.1)                       | 274 (33.9)                       | 0.91 (0.73, 1.15)                             |
| 2.7 or more people per bedroom                                        | 277 (68.7)                       | 126 (31.3)                       |                                               |
| <b>Poverty index (n=1,212)<sup>d</sup></b>                            |                                  |                                  |                                               |
| Not poor                                                              | 378 (67.0)                       | 186 (33.0)                       | 0.96 (0.82, 1.11)                             |

|                                  |            |            |                   |
|----------------------------------|------------|------------|-------------------|
| Poor                             | 349 (65.6) | 183 (34.4) |                   |
| Extremely poor                   | 85 (73.3)  | 31 (26.7)  |                   |
| Household member is seropositive |            |            |                   |
| No                               | 323 (36.1) | 74 (16.2)  |                   |
| Yes                              | 572 (63.9) | 382 (83.8) | 1.97 (1.43, 2.69) |

---

<sup>a</sup>Smoking status assessed among participants older than 13 years of age.

<sup>b</sup>Diagnosed by medical professional as reported by participant, including diabetes, hypertension, obesity, malignancy, and autoimmune disease.

<sup>c</sup>Strict = never left the house since first cases reported or occasionally leaves house and always uses a mask; Moderate=Occasionally leaves the house and sometimes uses a mask; None = Occasionally leaves the house and never uses a mask or no distancing or quarantine behavior.

<sup>d</sup>Poverty index calculated based on presence of basic needs, including household sanitation, education, economic dependency, and household crowding.

## REFERENCES

1. COVID-19 Map - Johns Hopkins Coronavirus Resource Center.  
<https://coronavirus.jhu.edu/map.html>. Accessed February 9, 2021.
2. Percivalle E, Cambiè G, Cassaniti I, et al. Prevalence of SARS-CoV-2 specific neutralising antibodies in blood donors from the Lodi Red Zone in Lombardy, Italy, as at 06 April 2020. *Euro Surveill.* 2020;25(24). doi:10.2807/1560-7917.ES.2020.25.24.2001031
3. Xu X, Sun J, Nie S, et al. Seroprevalence of immunoglobulin M and G antibodies against SARS-CoV-2 in China. *Nat Med.* 2020;26(8):1193-1195. doi:10.1038/s41591-020-0949-6
4. Vielot NA, González F, Reyes Y, et al. Risk Factors and Clinical Profile of Sapovirus-associated Acute Gastroenteritis in Early Childhood: A Nicaraguan Birth Cohort Study. *Pediatr Infect Dis J.* January 2021. doi:10.1097/INF.0000000000003015
5. Premkumar L, Segovia-Chumbez B, Jadi R, et al. The receptor binding domain of the viral spike protein is an immunodominant and highly specific target of antibodies in SARS-CoV-2 patients. *Sci Immunol.* 2020;5(48). doi:10.1126/sciimmunol.abc8413
6. Interim Guidelines for COVID-19 Antibody Testing. Centers for Disease Control and Prevention.  
<https://www.cdc.gov/coronavirus/2019-ncov/lab/resources/antibody-tests-guidelines.html>.  
Published February 11, 2020. Accessed February 9, 2021.
7. Silva AAM da, Lima-Neto LG, Azevedo C de MPES de, et al. Population-based seroprevalence of SARS-CoV-2 and the herd immunity threshold in Maranhão. *Rev Saude Publica.* 2020;54:131.  
doi:10.11606/s1518-8787.2020054003278
8. Naranbhai V, Chang CC, Beltran WFG, et al. High Seroprevalence of Anti-SARS-CoV-2 Antibodies in Chelsea, Massachusetts. *J Infect Dis.* 2020;222(12):1955-1959.  
doi:10.1093/infdis/jiaa579

9. Lumley SF, Wei J, O'Donnell D, et al. The duration, dynamics and determinants of SARS-CoV-2 antibody responses in individual healthcare workers. *Clin Infect Dis*. January 2021.  
doi:10.1093/cid/ciab004
10. Huete-Pérez JA, Cabezas-Robelo C, Páiz-Medina L, Hernández-Álvarez CA, Quant-Durán C, McKerrow JH. First report on prevalence of SARS-CoV-2 infection among health-care workers in Nicaragua. *PLoS One*. 2021;16(1):e0246084. doi:10.1371/journal.pone.0246084
11. Syangtan G, Bista S, Dawadi P, et al. Asymptomatic SARS-CoV-2 Carriers: A Systematic Review and Meta-Analysis. *Front Public Health*. 2020;8:587374. doi:10.3389/fpubh.2020.587374
12. Signorelli C, Odone A, Stirparo G, et al. SARS-CoV-2 transmission in the Lombardy Region: the increase of household contagion and its implication for containment measures. *Acta Biomed*. 2020;91(4):e2020195. doi:10.23750/abm.v91i4.10994
